# Supplementary material for: Resonant waveguide grating based assays for colloidal aggregate detection and promiscuity characterization in natural products
Source: Royal Society of Chemistry journal article supplement (doi:10.1039/c9ra06466d), 2019-01-01
Supplement: c9ra06466d1.pdf [file c9ra06466d1.pdf]

1 **Supporting information**

2

3 **Resonant waveguide grating based assays for colloidal aggregates detection and promiscuity**  
4 **characterization in natural products**

5 Rong Wang,<sup>ab</sup> Jixia Wang,<sup>ad</sup> Yanfang Liu,<sup>\*ad</sup> Xiuli Zhang,<sup>\*c</sup> and Xinmiao Liang<sup>ad</sup>

6 \*Corresponding authors

7 <sup>a</sup>Key Lab of Separation Science for Analytical Chemistry, Dalian Institute of Chemical Physics, Chinese Academy of Sciences,

8 Dalian 116023, China

9 <sup>b</sup>University of Chinese Academy of Sciences, Beijing 100049, China

10 <sup>c</sup>College of Pharmaceutical Science, Soochow University, Suzhou 215123, China

11 <sup>d</sup>DICP-CMC Innovation Institute of Medicine, Taizhou 225300, China

12 E-mail addresses: [zhangxl@suda.edu.cn](mailto:zhangxl@suda.edu.cn); [liuyanfang@dicp.ac.cn](mailto:liuyanfang@dicp.ac.cn)

13

14 Table S1. Comparison between the CAC values and the IC<sub>50</sub> values in M3 desensitization assay.

| Compound           | IC <sub>50</sub> value (M3 desensitization) | CAC value |
|--------------------|---------------------------------------------|-----------|
| Procyanidins       | 57 μM                                       | 2.8 μM    |
| Salvianolic acid C | 78 μM                                       | 1.0 μM    |
| Quercetin          | 116 μM                                      | 5.7 μM    |

15

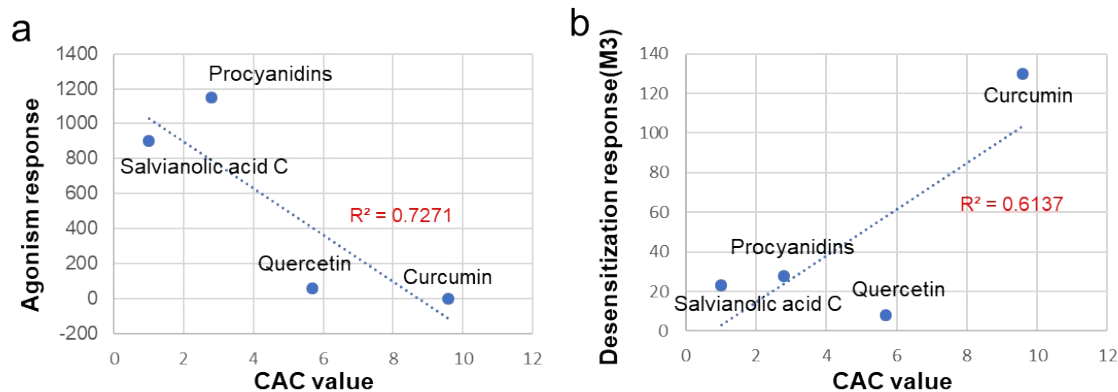

16

17 Figure S1: The correlation between DMR responses and CAC values. (a) DMR agonism responses as a

18 function of CAC values. (b) DMR desensitization responses on M3 receptor as a function of CAC

19 values. All the four compounds were 100 μM.
